# Supplementary material for: The RALE Score Versus the CT Severity Score in Invasively Ventilated COVID-19 Patients—A Retrospective Study Comparing Their Prognostic Capacities
Source: MDPI journal article supplement (doi:10.3390/diagnostics12092072), 2022-08-26
Supplement: s1 [file s1]

## Supplementary material

# The RALE score versus the CT Severity Score in Invasively Ventilated COVID-19 Patients—A Retrospective Study Comparing Their Prognostic Capacities

**Figure S1.** The RALE scoring sheet, showing the total score and the score for each of the four quadrants for a representative study patient.

RALE, radiographic assessment of lung edema; Q, chest x-ray quadrant.

| Consolidation <sup>a</sup> |                              | Calculation of the RALE score for radiograph |              |              |              |               |           |
|----------------------------|------------------------------|----------------------------------------------|--------------|--------------|--------------|---------------|-----------|
| Consolidation Score        | Extent of alveolar opacities | Score                                        | Q1           | Q2           | Q3           | Q4            | Total     |
| 0                          | None                         | Consolidation                                | 2            | 1            | 3            | 4             |           |
| 1                          | < 25 %                       | Density                                      | 3            | 3            | 3            | 3             |           |
| 2                          | 25 – 50 %                    | Quadrant Score                               | 2 x 3<br>= 6 | 1 x 3<br>= 3 | 3 x 3<br>= 9 | 4 x 3<br>= 12 | <b>30</b> |
| 3                          | 50 – 75 %                    |                                              |              |              |              |               |           |
| 4                          | > 75 %                       |                                              |              |              |              |               |           |

| Density <sup>b</sup> |                               |
|----------------------|-------------------------------|
| Density Score        | Density of alveolar opacities |
| 1                    | Hazy                          |
| 2                    | Moderate                      |
| 3                    | Dense                         |

| Final RALE Score <sup>c</sup> |                       |
|-------------------------------|-----------------------|
| Right Lung                    | Left Lung             |
| Upper Quadrant                | Upper Quadrant        |
| Cons x Den = Q1 Score         | Cons x Den = Q3 Score |
| Lower Quadrant                | Lower Quadrant        |
| Cons x Den = Q2 Score         | Cons x Den = Q4 Score |

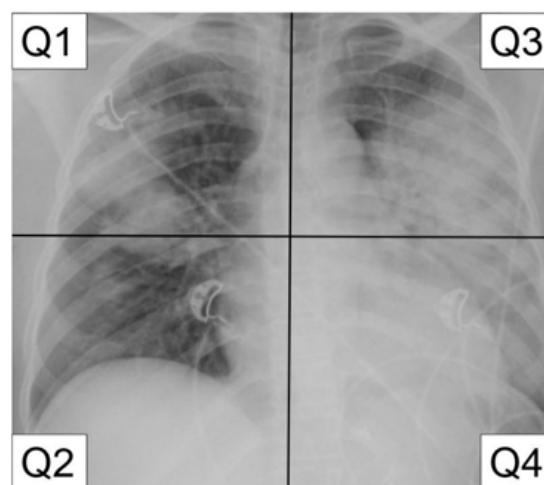

**Total RALE = Q1 + Q2 + Q3 + Q4**

<sup>a</sup> Consolidation is scored for each quadrant

<sup>b</sup> Density is scored for each quadrant having a consolidation > 0

<sup>c</sup> If Quadrant consolidation Score is 0 then Quadrant score is 0

**Table S1.** The CT severity score per lobe. A system for scoring ground-glass opacity, interstitial opacity, and air trapping on thin-section CT scan.

| Score                   | Definition      |
|-------------------------|-----------------|
| 0                       | None            |
| 1                       | <5% of lobe*    |
| 2                       | 5%–25% of lobe  |
| 3                       | 26%–49% of lobe |
| 4                       | 50%–75% of lobe |
| 5                       | >75% of lobe    |
| *minimal but not normal |                 |
| Maximum of 25 point     |                 |

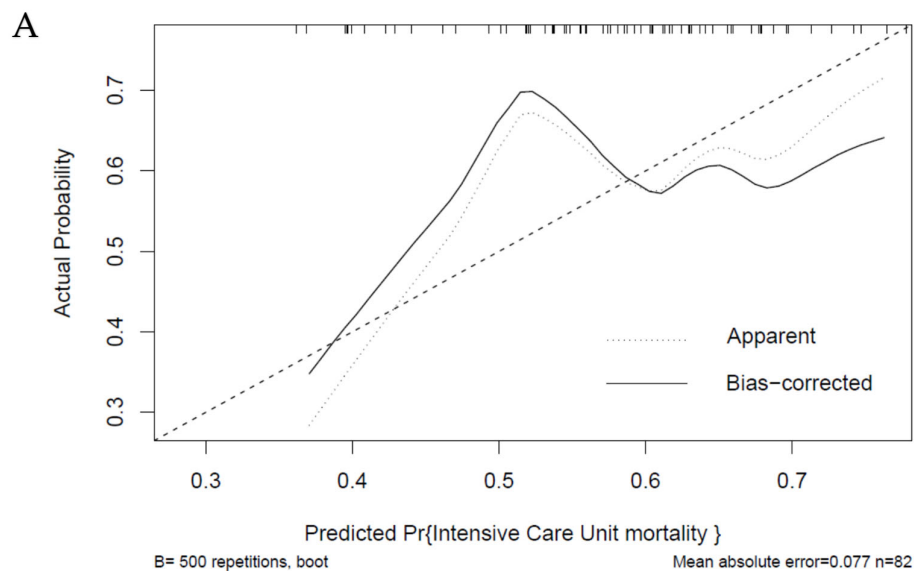

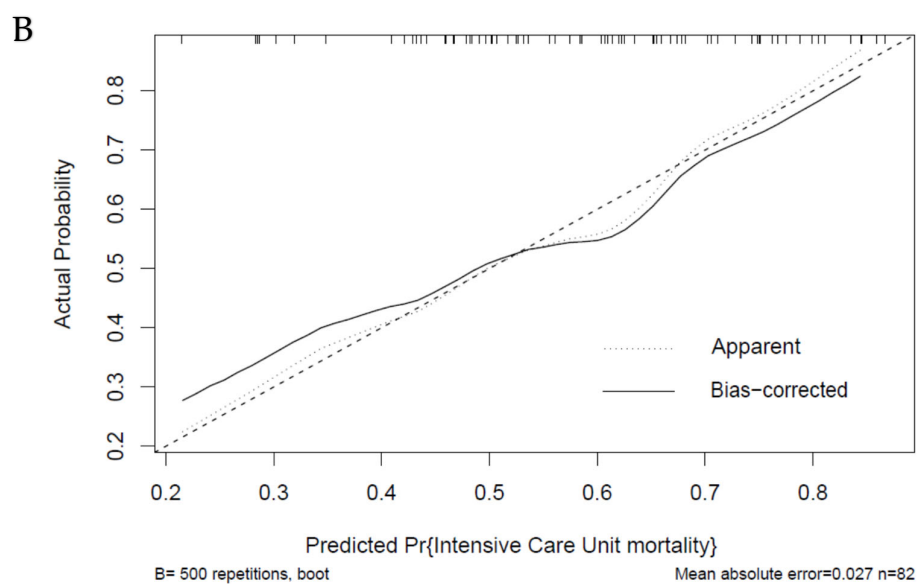

**Figure S2.** Calibration plots of the fitted model of (A) the RALE score and (B) the CTSS.

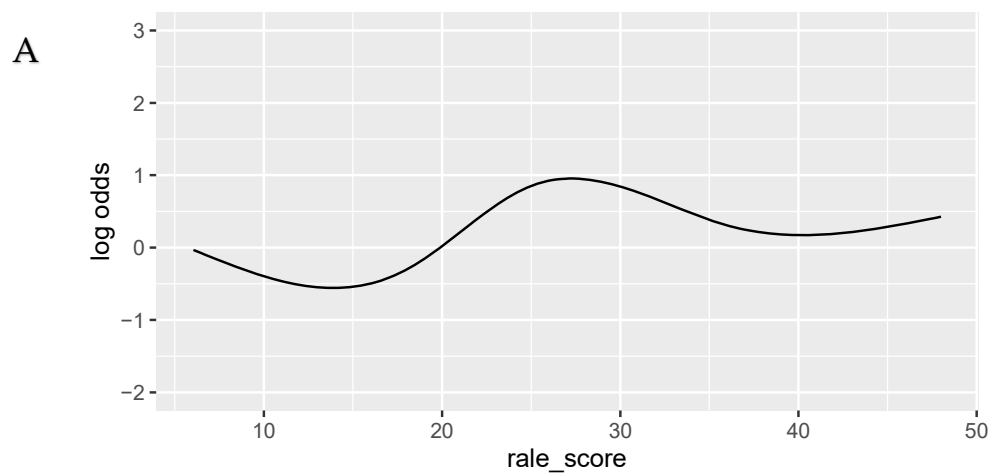

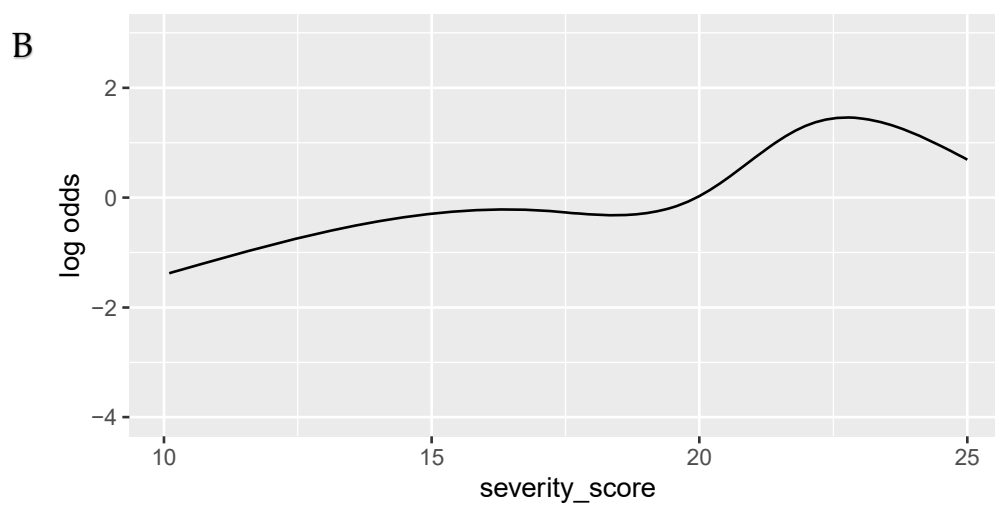

**Figure S3.** Spline graphical association of the RALE score (panel A) and CTSS (panel B) versus ICU mortality, adjusted median APACHE II of 12 score and BMI of 29.
